# Supplementary material for: Ventilator-associated pneumonia among ICU patients in WHO Southeast Asian region: A systematic review
Source: PubMed Central journal article supplement (PMC7942996; doi:10.1371/journal.pone.0247832), 2021-03-09
Supplement: pone.0247832.s002.pdf [file pone.0247832.s002.pdf]

# Supplementary Content

## Search strategy

Date of search= 22<sup>nd</sup> September 2020

### For PubMed:

((((Incidence OR Prevalence OR VAP rate OR Epidemiology OR Frequency OR "Microbiology"[Mesh])) AND (((((((("Respiration, Artificial"[Mesh]) OR (ventilator acquired)) OR (Ventilator-associated)) OR (ventilator associated)) AND ("Pneumonia, Bacterial"[Mesh])) OR (((VAP) OR (Early VAP)) OR (Late VAP))) OR ("Pneumonia, Ventilator-Associated"[Mesh]))) AND (((((((((((Bangladesh) OR (Bhutan)) OR (India)) OR (Maldives)) OR (Nepal)) OR (Indonesia)) OR (Thailand)) OR (Srilanka)) OR (Myanmar)) OR (Timor-Leste)) OR (South Korea))) AND (((((((((((((((((((Cohort design) OR Cohort stud\*) OR Cohort studies) OR Cross-sectional design) OR Cross-sectional stud\*) OR Cross-sectional studies) OR Epidemiologic stud\*) OR Epidemiologic studies) OR Longitudinal design) OR Longitudinal stud\*) OR Observational stud\*) OR Population stud\*) OR Prospective design) OR Prospective stud\*) OR Prospective studies) OR Prospective design) OR Prospective stud\*) OR Prospective studies) OR Retrospective design) OR Retrospective stud\*) OR Retrospective studies)) AND ((humans[Filter]) AND (english[Filter]) AND (2000:2020[pdat]))

**For Embase:**

#21. #9 AND #17 AND #18 AND #19 AND [english]/lim AND

[humans]/lim AND [1-1-2000]/sd NOT [23-8-2020]/sd

#20. #9 AND #17 AND #18 AND #19

#19. #10 OR #11 OR #12 OR #13 OR #14 OR #15

#18. #4 OR #5 OR #6 OR #7

#17. #1 OR #8 OR #16

#16. #2 AND #3

#15. 'longitudinal study'/exp

#14. 'prospective study'/exp

#13. 'retrospective study'/exp

#12. 'case control study'/exp

#11. 'cross-sectional study'/exp

#10. 'cohort analysis'/exp

#9. 'bhutan' OR 'bangladesh' OR 'nepal' OR 'india' OR

'maldives' OR 'myanmar' OR 'thailand' OR 'sri

lanka' OR 'timor-leste' OR 'indonesia' OR 'south

korea'

#8. ventilator AND associated AND pneumonia

#7. epidemiology

#6. 'infection rate'/exp

#5. 'incidence'/exp OR incidence

#4. 'prevalence'/exp OR prevalence

#3. 'bacterial pneumonia'/exp

#2. 'artificial ventilation'/exp

#1. 'ventilator associated pneumonia'/exp
